# Supplementary material for: Strong SARS-CoV-2 T-Cell Responses after One or Two COVID-19 Vaccine Boosters in Allogeneic Hematopoietic Stem Cell Recipients
Source: MDPI journal article supplement (doi:10.3390/cells11193010), 2022-09-27
Supplement: s1 [file s1]

*Article*

# **Strong SARS-CoV-2 T-cell Responses after One or Two COVID-19 Vaccine Boosters in Allogeneic Hematopoietic Stem Cells Recipients**

Béatrice Clémenceau,<sup>1</sup> Amandine Le Bourgeois,<sup>2</sup> Thierry Guillaume,<sup>1,2</sup> Marianne Coste-Burel,<sup>3</sup> Pierre Peterlin,<sup>2</sup> Alice Garnier,<sup>2</sup> Maxime Jullien,<sup>2</sup> Jocelyn Ollier,<sup>1</sup> Audrey Grain,<sup>1</sup> Marie C Béné,<sup>1,4</sup> Patrice Chevallier,<sup>1,2</sup>

**Supplemental files**

**Table S1: Factors predicting T-cell response: Univariate analysis**

| <b>Factors</b>                                       | <b>Non responders n=8</b> | <b>Responders n=44</b> | <b>P value</b> |
|------------------------------------------------------|---------------------------|------------------------|----------------|
| Number of vaccines received: 3/4                     | 6/2                       | 34/10                  | 1              |
| Anti-spike antibody rate: $\leq 250$ / $>250$ BAU/mL | 2/6                       | 8/36                   | 1              |
| Gender: male/female                                  | 8/0                       | 25/19                  | 0.053          |
| Median age: years (range)                            | 57 (49-71)                | 53 (20-74)             | 0.84           |
| Disease: lymphoid/myeloid                            | 3/5                       | 13/31                  | 0.97           |
| Donor type: geno/MUD/haplo/mism                      | 1/5/2/0                   | 14/17/11/2             | 0.54           |
| Conditioning: MAC/RIC/Sequential                     | 2/6/0                     | 6/35/3                 | 0.56           |
| GVHD prophylaxis:                                    |                           |                        |                |
| ATG/Csa+MMF+PTCY/PTCY alone                          | 5/2/1                     | 23/11/10               | 0.79           |
| Previous GVHD: no/yes                                | 3/5                       | 17/27                  | 1              |
| Ongoing treatment: no/yes                            | 7/1                       | 34/10                  | 0.85           |
| Median delay V3/V4-analyses: days (range)            | 94 (12-295)               | 136 (16-298)           | 0.46           |
| Median delay graft-analyses: days (range)            | 703 (356-4047)            | 755 (189-5293)         | 0.70           |
| Lymphocytes: $10^9$ /L (range)                       | 2.66 (0.75-3.96)          | 1.37 (0.12-7.14)       | 0.053          |
| Gamma globulins: g/L (range)                         | 7.7 (3.4-17.3)            | 6.75 (1.1-13.9)        | 0.53           |

**Table S2: Vaccinated patient characteristics according to humoral responses**

| Allogeneic hematopoietic stem-cell recipients<br>(N=52, 3 doses n=40; 4 doses n=12)<br>Antibody response after V3/V4 |                 |                         |                             |                           |
|----------------------------------------------------------------------------------------------------------------------|-----------------|-------------------------|-----------------------------|---------------------------|
|                                                                                                                      | Whole Cohort    | No (<0.8<br>BAU/mL) n=5 | Low (0.8-250<br>BAU/mL) n=5 | High (>250<br>BAU/L) n=42 |
| T-cell response after V3/V4 . Patients (%)                                                                           | 44 (85%)        | 3 (60%)                 | 5 (100%)                    | 36 (86%)                  |
| Median % (range) of anti-spike T cells                                                                               | 0.037 (0-1.143) | 0.039 (0-0.641)         | 0.056 (0.002-0.771)         | 0.034 (0-1.143)           |
| Median time from transplant to V1: days (range)                                                                      | 389 (86-4939)   | 207 (102-327)           | 228 (127-1402)              | 617 (86-4939)             |
| Median time from transplant to V3/V4: days (range)                                                                   | 616 (167-5160)  | 395 (207-482)           | 287 (216-1551)              | 758 (167-5160)            |
| Median time from transplant to humoral and T cells responses analyses: days (range)                                  | 755 (189-5293)  | 407 (401-649)           | 400 (238-1663)              | 988 (189-5293)            |
| Median time from V1 to humoral and T cells responses analyses: days (range)                                          | 330 (84-404)    | 250 (161-322)           | 175 (98-397)                | 347 (84-404)              |
| Median time from V3/V4 to humoral and T cells responses analyses: days (range)                                       | 125 (12-298)    | 50 (12-196)             | 74 (22-113)                 | 217 (16-298)              |
| <b>Gender:</b> Male/Female                                                                                           | 33/19           | 3/2                     | 2/3                         | 28/14                     |
| <b>Median age:</b> years (range)                                                                                     | 54 (20-74)      | 57 (32-71)              | 52 (34-59)                  | 55 (20-74)                |
| <b>Underlying disease:</b>                                                                                           |                 |                         |                             |                           |
| AML/MDS/MPS (myeloid)                                                                                                | 20/10/6 (36)    | 3/1/0 (4)               | 2/0/0 (2)                   | 15/9/6 (30)               |
| ALL/NHL/HL/MM (lymphoid)                                                                                             | 8/4/3/1 (16)    | 0/0/1/0 (1)             | 2/1/0/0 (3)                 | 6/3/2/1 (12)              |
| <b>Donor type:</b>                                                                                                   |                 |                         |                             |                           |
| Geno-identical/MUD/Haplo/9/10 mis-MUD                                                                                | 15/22/13/2      | 0/4/1/0                 | 1/3/1/0                     | 14/15/11/2                |
| <b>Conditioning:</b>                                                                                                 |                 |                         |                             |                           |
| Myeloablative/Reduced-intensity/Sequential                                                                           | 8/41/3          | 0/4/1                   | 2/2/1                       | 6/35/1                    |
| <b>GVHD prophylaxis:</b>                                                                                             |                 |                         |                             |                           |
| CsA+ ATG (+/-MMF or methotrexate)                                                                                    | 28              | 4                       | 3                           | 21                        |
| CsA+MMF+PTCY                                                                                                         | 13              | 1                       | 2                           | 10                        |
| PTCY only                                                                                                            | 11              | 0                       | 0                           | 11                        |
| <b>Previous GVHD:</b> No/Yes                                                                                         | 20/32           | 1/4                     | 0/5                         | 19/23                     |
| <b>Ongoing treatment:</b> No/Yes*                                                                                    | 41/11           | 4/1                     | 2/3                         | 35/7                      |

Abbreviations: V1: first vaccine; V3: third vaccine; V4: fourth vaccine; AML: acute myeloid leukemia; MDS: myelodysplastic syndrome; MPS: myeloproliferative syndrome; ALL: acute lymphoblastic leukemia; NHL: non-Hodgkin lymphoma; HL: Hodgkin lymphoma; MM: multiple myeloma; MUD: matched unrelated donor; GVHD : graft-versus-host disease; CsA: cyclosporine; MMF: mycophenolate mofetil; PTCY: post-transplant Cyclophosphamide; NA: not applicable.

\*: immunosuppressive drugs for active GVHD: CsA (+ corticosteroids)n=4 (2); corticosteroids alone n=1; ruxolitinib (+ corticosteroids) n=4 (1); or chemotherapy: ponatinib as relapse prophylaxis n=1; vincristine+ corticosteroids for relapse n=1.

## Supplemental Figure S1

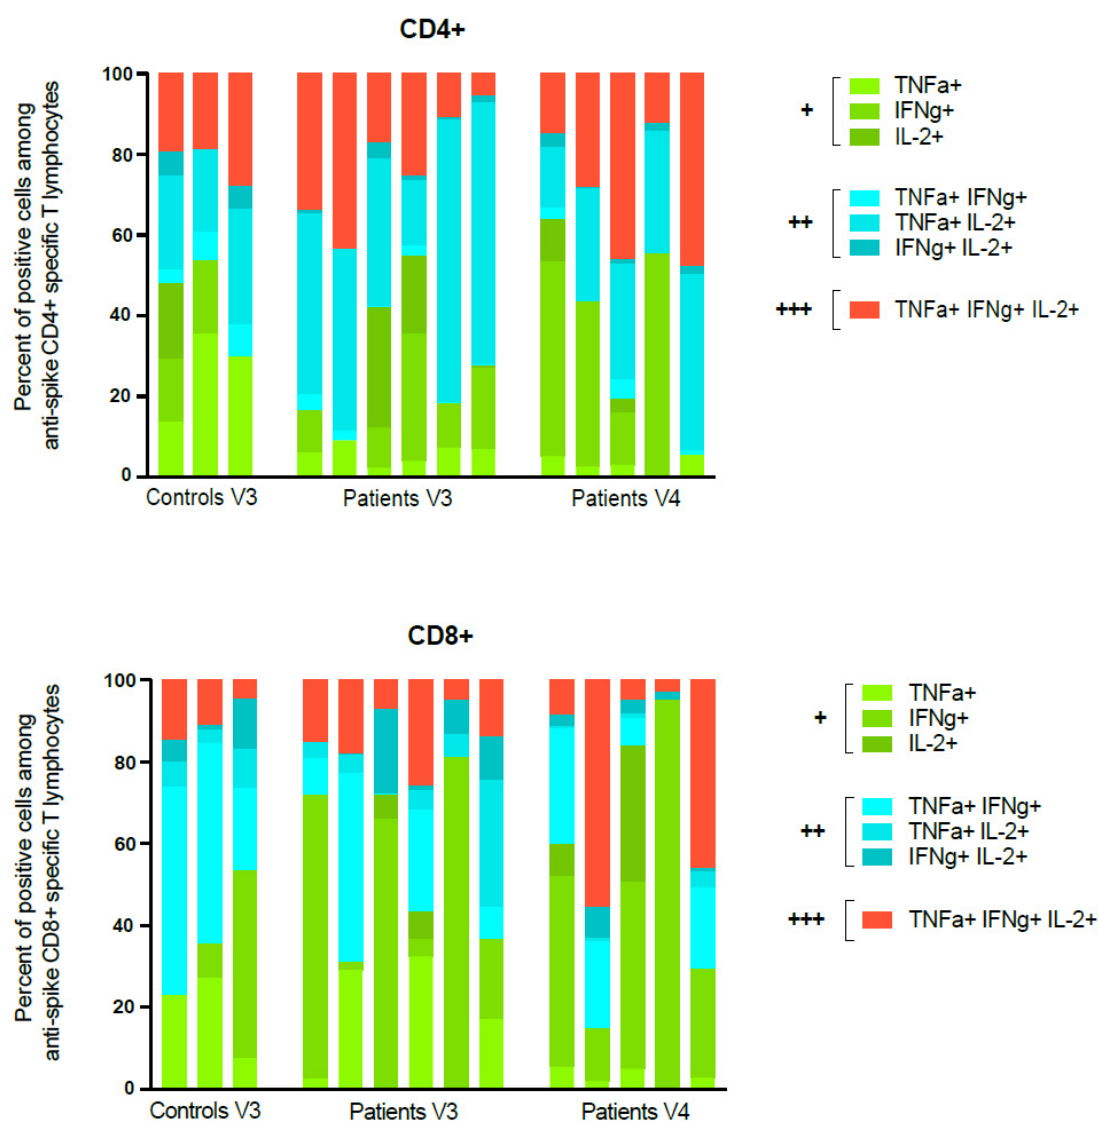

Figure S1: (A) CD4+ and (B) CD8+ T-cell poly-functionality analysis. Bars represent the proportion of T-cells displaying each particular cytokine profile (7 possible combinations of positive responses). Colors depict the distribution of mono-(green), bi-(blue) and tri-(red) cytokine-producing T cells.
